# Supplementary material for: A novel heterojunction layer-assisted interfacial defect control strategy for high-performance solar cells
Source: Royal Society of Chemistry journal article supplement (doi:10.1039/d3nj05749f), 2024-01-01
Supplement: d3nj05749f1.pdf [file d3nj05749f1.pdf]

**Novel heterojunction layer assisted interfacial defect control  
strategy for high-performance solar cells**

Zihui Liang<sup>1,2#</sup>, Qiangqiang Cui<sup>1#</sup>, Yijun Zhou<sup>2#</sup>, Cheng Zeng<sup>1</sup>,  
Fengxiang Chen<sup>1\*</sup>, Li Zhao<sup>2\*</sup>, Changhai Yi<sup>1\*</sup>

<sup>1</sup>National Local Joint Laboratory for Advanced Textile Processing and Clean Production, Hubei Key Laboratory of Digital Textile Equipment, Wuhan Textile University, Wuhan 430073, China

<sup>2</sup>Ministry-of-Education Key Laboratory for the Green Preparation and Application of Functional Materials, Hubei Key Laboratory of Polymer Materials, Hubei University, Wuhan 430062, China

\*Corresponding authors

**Email:** [fxchen\\_czx@wtu.edu.cn](mailto:fxchen_czx@wtu.edu.cn); [zhaoli7376@163.com](mailto:zhaoli7376@163.com); [yich@wtu.edu.cn](mailto:yich@wtu.edu.cn)

**# Contribute Equally**

## Supplementary experimental section

**Preparation of g-C<sub>3</sub>N<sub>4</sub>:** 20 g of melamine is placed in an alumina crucible cover with aluminum foil, and the temperature is raised to 550 °C (heating rate is 10 °C/min)) and held for 3 h. The product is naturally cooled to room temperature.

**Preparation of GO:** 3 g of 99.95% pure graphite sheets, 2.5 g of K<sub>2</sub>S<sub>2</sub>O<sub>8</sub> and 2.5 g of P<sub>2</sub>O<sub>5</sub> were dissolved in 24 ml of concentrated sulfuric acid and then stirred at 80 °C for about 4.5 hours. After cooling, it was diluted with deionized water and continued to stir for 12 hours, and filtered with a 0.45 μm porous membrane. Subsequently, it is cleaned with deionized water to a pH value of about 7 and dried at 40 °C for 12 hours to obtain pre-oxidized graphite.

The pre-oxidized graphite powder is added to 120 ml of concentrated sulfuric acid and stirred in an ice bath at 0 °C until completely dissolved. Then slowly and continuously add 10 g of KMnO<sub>4</sub> and 1.5 g of NaNO<sub>3</sub>, controlling the reaction temperature not to exceed 10 °C, after stirring for 1 hour, heating up to 35 °C and continue stirring for 2 hours. Then slowly add 125 ml of deionized water to the reaction solution, transfer the flask containing the solution to the oil bath at 98 °C, and continue stirring for 15 minutes. Then 250 ml of deionized water was added to dilute, and finally 10 ml of hydrogen peroxide (30%) was added to the reaction solution, so that the residual KMnO<sub>4</sub> and manganese dioxide reaction to produce soluble manganese sulfate. The resulting solution will turn yellow-brown in color. The product was cleaned several times with 35% concentrated hydrochloric acid, and then cleaned with deionized water to pH 6, and dispersed with ultrasonic waves to ensure that the product has a good dispersion effect. The prepared product is dried at 40 °C to obtain graphene oxide powder.

**Figure S1**

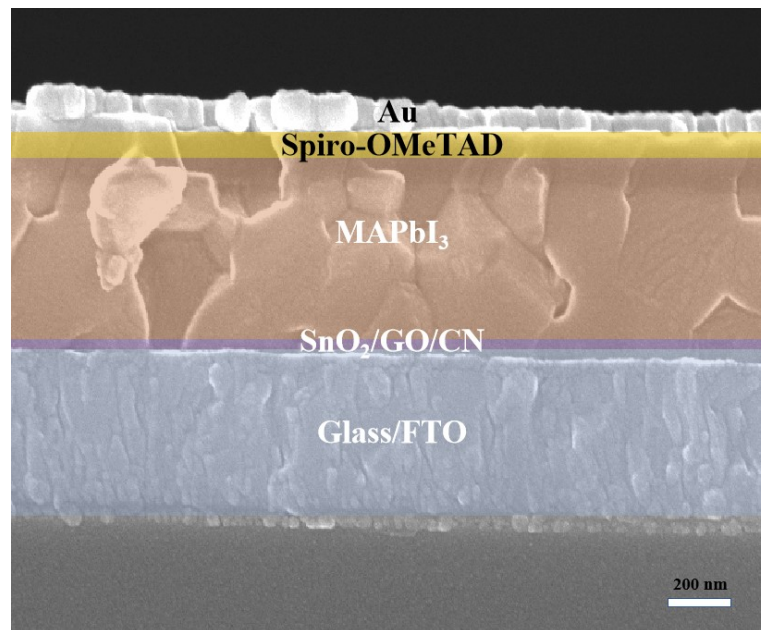

**Figure S1.** The Cross-sectional SEM image of PSCs

**Figure S2**

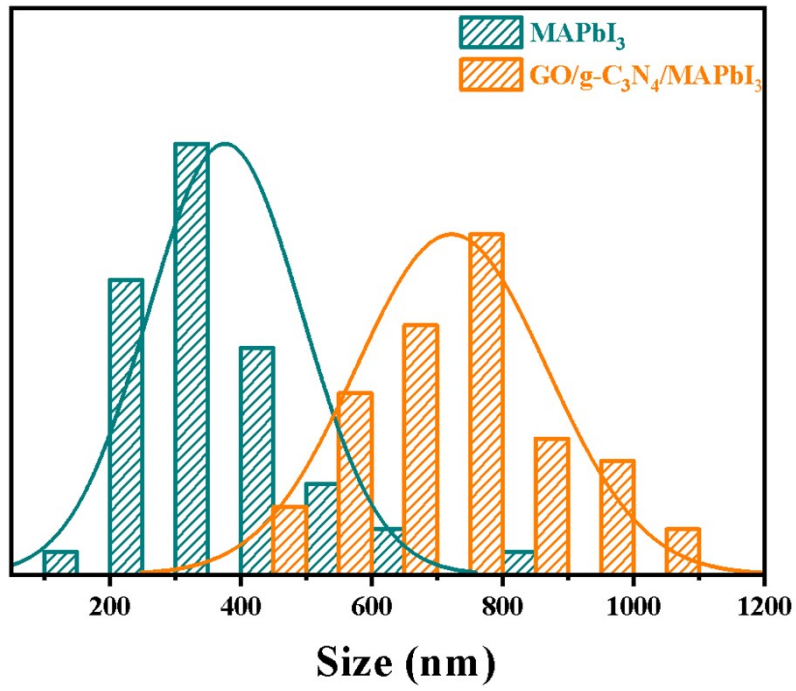

**Figure S2.** Statistic histogram distribution of crystal grain sizes for the MAPbI<sub>3</sub> film and GO/g-C<sub>3</sub>N<sub>4</sub>/MAPbI<sub>3</sub>

**Figure S3**

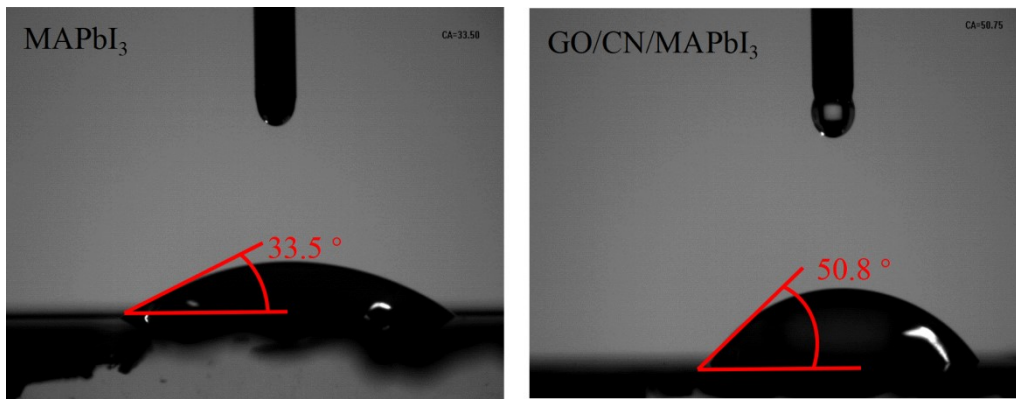

**Figure S3.** The water contact angles of MAPbI<sub>3</sub> and GO/g-C<sub>3</sub>N<sub>4</sub>/MAPbI<sub>3</sub> perovskite films

Figure S4

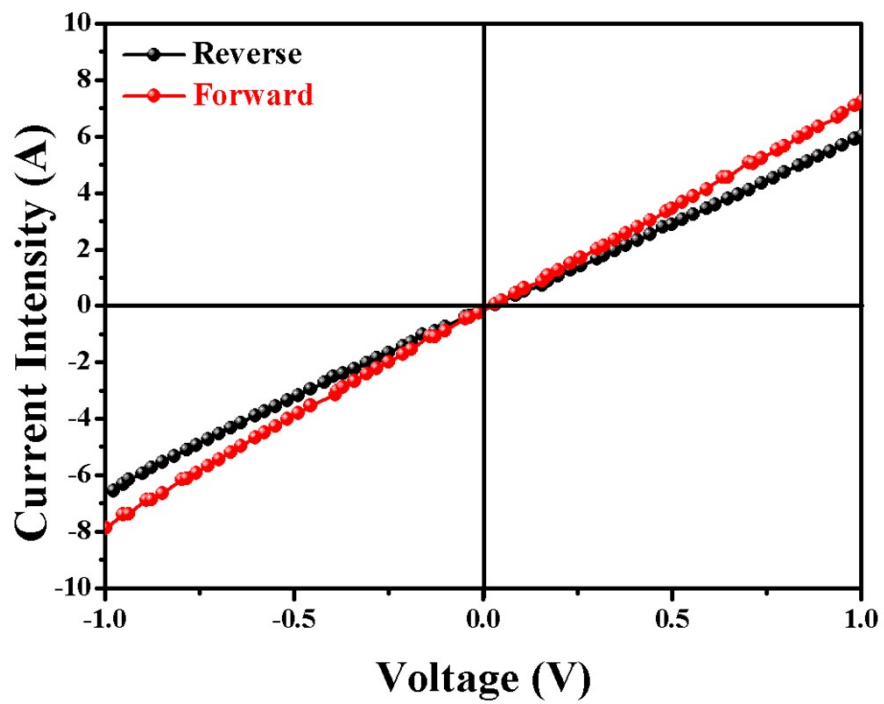

Figure S4. The forward/reverse IV characteristics of the "gold electrode /GO/g-C<sub>3</sub>N<sub>4</sub>/gold electrode" structure

Figure S5

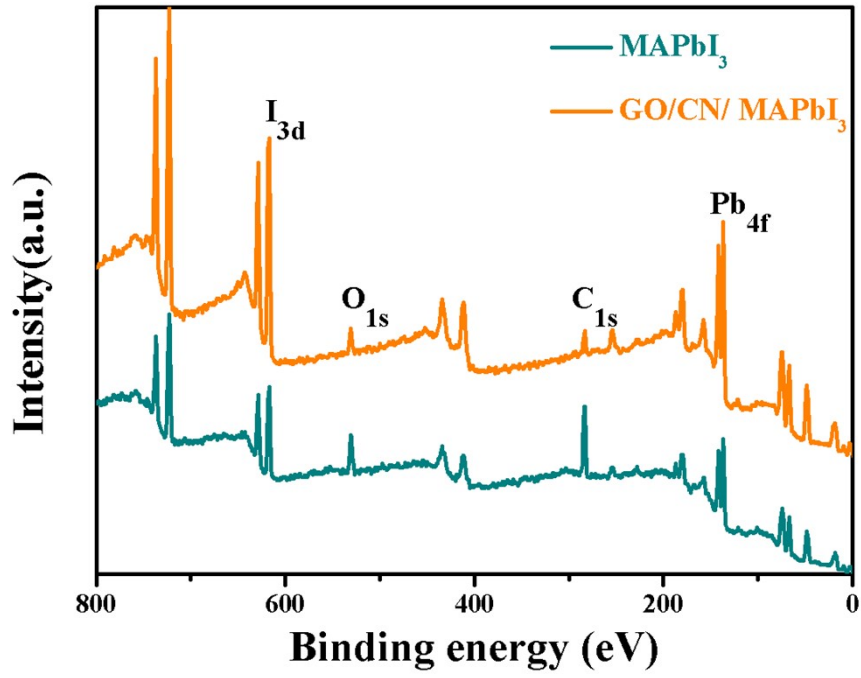

Figure S5. The XPS spectra of MAPbI<sub>3</sub> and GO/g-C<sub>3</sub>N<sub>4</sub>/MAPbI<sub>3</sub> perovskite films

Figure S6

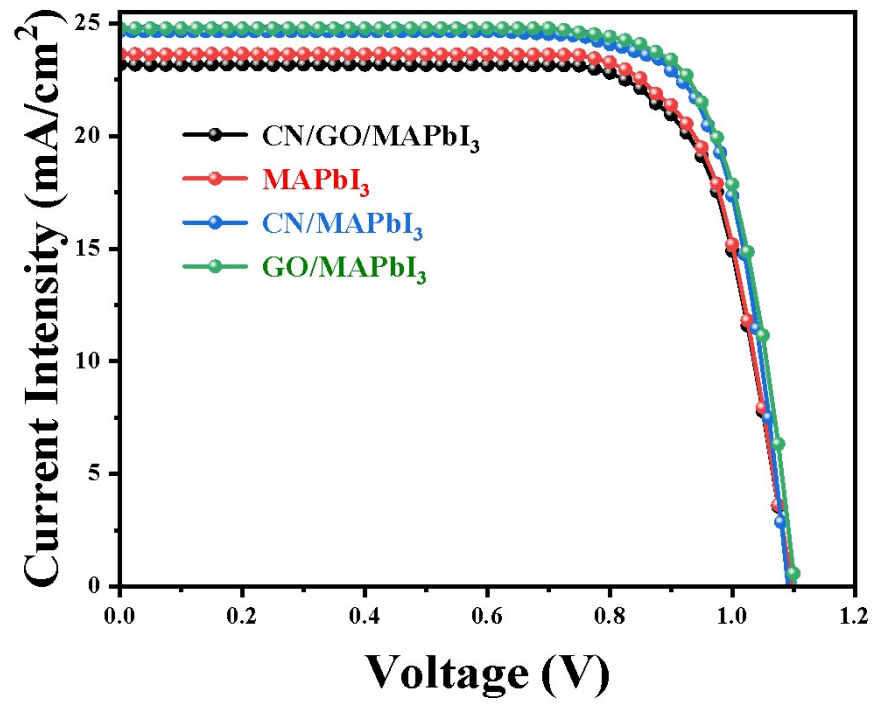

Figure S6. J-V curves of PSCs based on pristine, g-C<sub>3</sub>N<sub>4</sub>/GO/MAPbI<sub>3</sub>, GO/MAPbI<sub>3</sub> and g-C<sub>3</sub>N<sub>4</sub>/MAPbI<sub>3</sub> perovskite films.



**Figure S7**

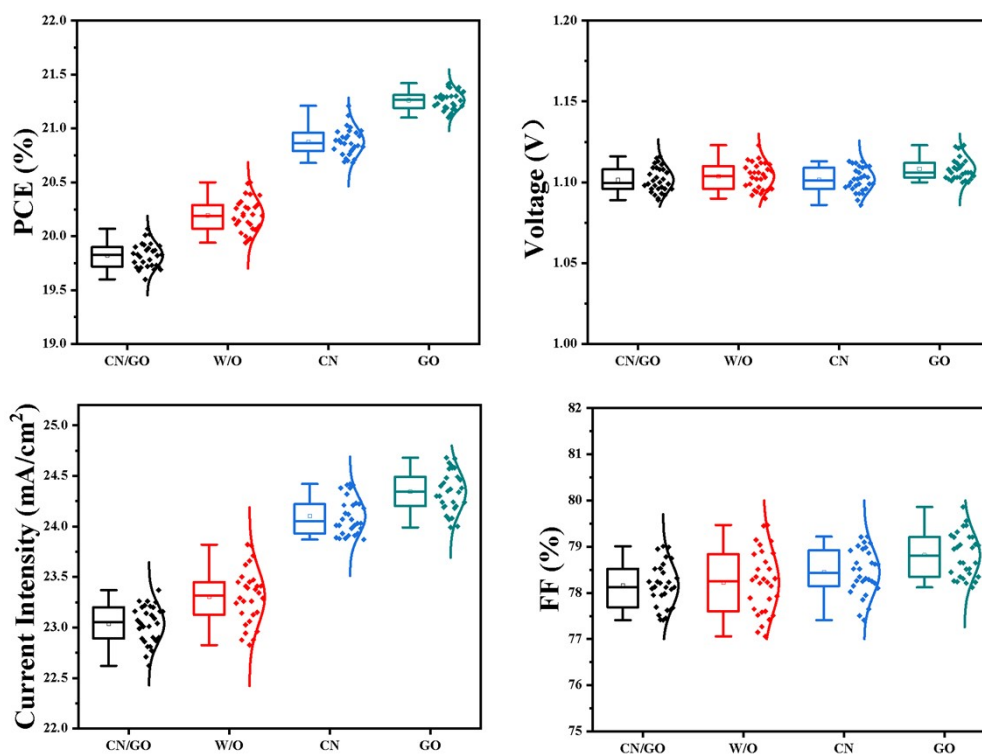

**Figure S7.** Statistical distribution of PCE,  $V_{OC}$ ,  $J_{SC}$ , and FF for the pristine and GO/g-  
 $C_3N_4/MAPI_3$  PSC.

Figure S8

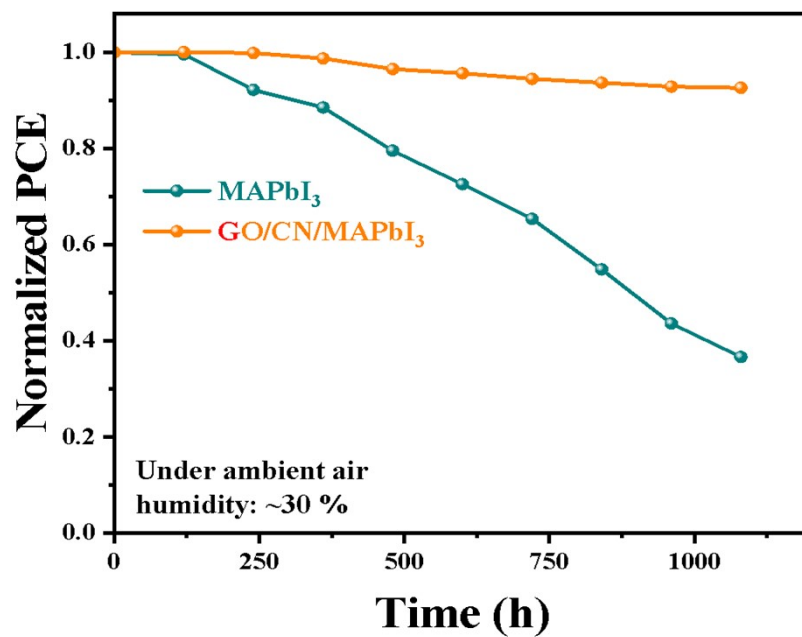

Figure S8. Long-term stability measurements of PSCs aging for 1080 h.

**Figure S9**

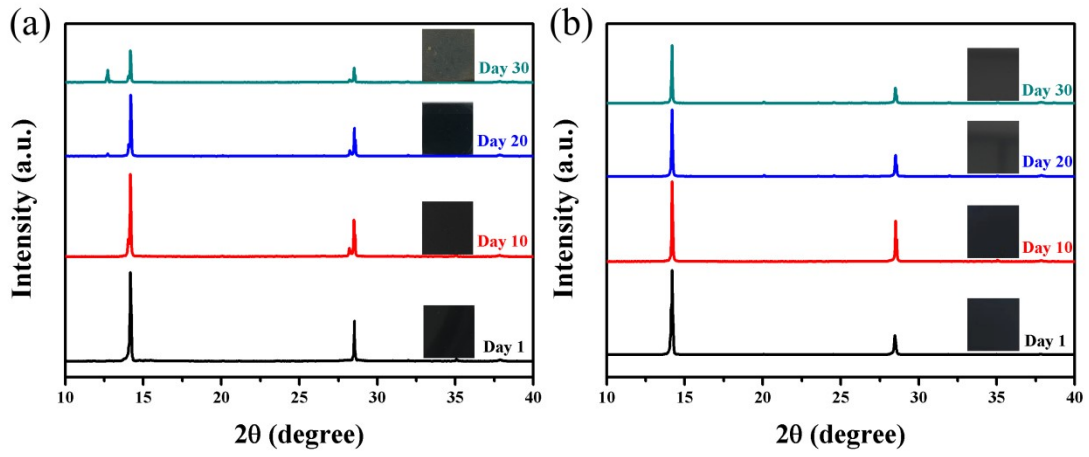

**Figure S9.** The XRD patterns of the (a) MAPbI<sub>3</sub> and (b) GO/g-C<sub>3</sub>N<sub>4</sub>/MAPbI<sub>3</sub> perovskite films in ambient air for 30 days

**Table S1****Table S1** Parameters calculated from the time-resolved PL spectra

|                                | $A_1$  | $\tau_1(\text{ns})$ | $A_2$  | $\tau_2(\text{ns})$ | $\tau_{\text{ave}}(\text{ns})$ |
|--------------------------------|--------|---------------------|--------|---------------------|--------------------------------|
| <b>MAPbI<sub>3</sub></b>       | 184.81 | 15.70               | 747.34 | 231.45              | 227.89                         |
| <b>GO/CN/MAPbI<sub>3</sub></b> | 436.04 | 29.92               | 512.79 | 127.01              | 110.81                         |

**Table S2**

**Table S2** Photovoltaic parameters of the n-i-p structure perovskite solar cells with different interface modification layer

|                                | $V_{oc}$ (V) | $J_{sc}$ (mA cm <sup>-2</sup> ) | FF (%) | PCE (%) |
|--------------------------------|--------------|---------------------------------|--------|---------|
| <b>MAPbI<sub>3</sub></b>       | 1.10         | 23.64                           | 78.86  | 20.50   |
| <b>CN/GO/MAPbI<sub>3</sub></b> | 1.10         | 23.21                           | 78.62  | 20.07   |
| <b>CN/MAPbI<sub>3</sub></b>    | 1.11         | 24.38                           | 79.10  | 21.21   |
| <b>GO/MAPbI<sub>3</sub></b>    | 1.10         | 24.51                           | 79.46  | 21.42   |
| <b>GO/CN/MAPbI<sub>3</sub></b> | 1.12         | 24.79                           | 79.80  | 22.58   |
